# Supplementary material
Source: HighWire-hosted journal article supplement (https://erj.ersjournals.com/content/60/2/2102665)

**Supplementary Table S1. Biomarker values of patients with active TB disease**

| ID  | TB1-NIL | TB2-NIL | IP-10 pg/mL<br>(log2) | MIG pg/mL<br>(log2) | IL-1ra pg/mL<br>(log2) |
|-----|---------|---------|-----------------------|---------------------|------------------------|
| 151 | 1.458   | 1.128   | 5,042.8 (12.3)        | 5,404.7 (12.4)      | 1,910.9 (10.9)         |
| 180 | 4.884   | 4.994   | 16,384.0 (14.0)       | 11,585.2 (13.5)     | 8,192.0 (13.0)         |
| 369 | 2.899   | 3.343   | 17,559.9 (14.1)       | 10,085.5 (13.3)     | 4,390.0 (12.1)         |
| 434 | 6.81    | 6.81    | 18,820.3 (14.2)       | 26,615.9 (14.7)     | 20,171.1 (14.3)        |
| 445 | 0.134   | 0.528   | 3,563.8 (11.8)        | 2,521.4 (11.3)      | 724.1 (9.5)            |

**Footnote**

TB1-NIL and TB2-NIL denote regular individual QuantiFERON Gold Plus (IFN- $\gamma$ ) values. Biomarker values in the table originate from the TB1-NIL/TB2-NIL with the highest IFN- $\gamma$  response.

**Supplementary Table S2. All biomarkers categorized by TB-endemicity**

| Biomarkers | Low-negative   |            |         | Borderline profile -* |            |              | Borderline profile + |            |         | Positive       |             |              |
|------------|----------------|------------|---------|-----------------------|------------|--------------|----------------------|------------|---------|----------------|-------------|--------------|
|            | Non TB-endemic | TB-endemic | p-value | Non TB-endemic        | TB-endemic | p-value      | Non TB-endemic       | TB-endemic | p-value | Non TB-endemic | TB-endemic  | p-value      |
| β-NGF      | 0              | 0          | 0.955   | 0                     | 0          | 0.775        | 0.7                  | 1.35       | 0.683   | 0              | 0           | 0.850        |
| CTACK      | 5              | 5.35       | 0.58    | <b>5.1</b>            | <b>0</b>   | <b>0.039</b> | 3.9                  | 4.8        | 0.807   | 1.85           | 3.8         | 0.382        |
| eotaxin    | 0              | 0          | 0.261   | 0                     | 0          | 0.389        | 0                    | 0          | 1.000   | 0              | 0           | 0.923        |
| FGF-basic  | 2.3            | 3.75       | 0.087   | 3.1                   | 2.2        | 0.621        | 2.1                  | 3.1        | 0.835   | 3.55           | 4.3         | 0.661        |
| G-CSF      | 4.2            | 3.95       | 1.000   | 6.1                   | 5.15       | 0.696        | 0                    | 6.5        | 0.347   | 0              | 6.3         | 0.193        |
| GM-CSF     | 0              | 0          | 0.973   | 0                     | 0          | 0.897        | 0                    | 0          | 0.454   | 0.5            | 1.5         | 0.937        |
| GRO-α      | 9.5            | 8.75       | 0.435   | 8.9                   | 8.1        | 0.735        | 8.8                  | 8.05       | 0.873   | 8.45           | 9.5         | 0.053        |
| HGF        | 5.2            | 5.5        | 0.422   | 5.7                   | 2.65       | 0.449        | 6.8                  | 4.95       | 0.334   | 7.5            | 7           | 0.856        |
| IFN-α2     | 0              | 2.55       | 0.505   | 2                     | 1          | 0.515        | 0.9                  | 0.8        | 0.910   | 1.5            | 2.9         | 0.648        |
| IFN-γ      | 3.2            | 3.85       | 0.087   | 3.9                   | 2.95       | 0.621        | 3.7                  | 3.5        | 0.683   | 4.4            | 5           | 0.346        |
| IL-1α      | 0              | 4.7        | 0.335   | 5.5                   | 1.75       | 0.307        | 0                    | 4.85       | 0.288   | 5.25           | 5.3         | 0.907        |
| IL-1β      | 4.2            | 6.4        | 0.491   | 5.9                   | 1.7        | 0.217        | 0                    | 3.25       | 0.592   | 5.1            | 5.9         | 0.609        |
| IL-1ra     | 10.3           | 10.1       | 0.596   | 9.3                   | 7.45       | 0.389        | 11                   | 10.35      | 0.098   | 11.95          | 11.8        | 0.140        |
| IL-2       | 2.3            | 3.8        | 0.271   | 1.5                   | 1.4        | 0.696        | 3.7                  | 4.1        | 0.413   | 5.45           | 5.6         | 0.842        |
| IL-2ra     | 5.5            | 5.7        | 0.710   | 0                     | 4.75       | 0.856        | 5.2                  | 5.1        | 0.936   | 4              | 5.8         | 0.161        |
| IL-3       | 0              | 0          | 0.795   | 0                     | 0          | 0.938        | 0                    | 0          | 0.427   | 0              | 0           | 0.804        |
| IL-4       | 0              | 0          | 0.884   | 0                     | 0.15       | 0.856        | 0                    | 0          | 0.475   | 0              | 1.1         | 0.156        |
| IL-5       | 0              | 2.1        | 0.660   | 0                     | 1.7        | 0.585        | 4.7                  | 2.25       | 0.728   | 0              | 0           | 0.482        |
| IL-6       | 7.8            | 7.5        | 0.565   | 4.9                   | 6.2        | 0.696        | 0                    | 6.9        | 0.458   | 0              | 7.5         | 0.054        |
| IL-7       | 0              | 0          | 0.848   | 0                     | 0          | 0.585        | 0                    | 0          | 0.112   | 0              | 0           | 0.240        |
| IL-8       | 11.9           | 13.15      | 0.324   | 12.3                  | 10.75      | 0.775        | 12.1                 | 12.05      | 0.457   | 12.25          | 12.1        | 0.916        |
| IL-9       | 5.5            | 6.3        | 0.612   | 5.5                   | 5.05       | 0.979        | 5.6                  | 5.9        | 0.733   | 5              | 6.4         | 0.201        |
| IL-10      | 0              | 0          | 0.973   | 0                     | 0.25       | 0.621        | 0                    | 0.85       | 0.051   | 0              | 0           | 0.703        |
| IL-12p70   | 0              | 0          | 0.937   | 0                     | 0          | 0.696        | 0                    | 0          | 0.373   | 0              | 0           | 0.213        |
| IL-12p40   | 4.6            | 4.5        | 0.884   | 6.3                   | 4.8        | 1.000        | 4.2                  | 0          | 0.962   | 0              | 5.6         | 0.195        |
| IL-13      | 0              | 0          | 0.660   | 0                     | 0          | 0.938        | 0                    | 0          | 0.478   | 0              | 0           | 0.150        |
| IL-15      | 0              | 2.5        | 0.123   | 0                     | 0          | 0.621        | 0                    | 0          | 0.161   | 0              | 0           | 0.490        |
| IL-16      | 0              | 0          | 0.491   | 1.3                   | 0          | 0.333        | 0                    | 0          | 0.742   | 3.4            | 4.8         | 0.921        |
| IL-17A     | 1.3            | 1.75       | 0.565   | 1.8                   | 0.55       | 0.217        | 0.1                  | 1.5        | 0.787   | 2.4            | 1.8         | 0.707        |
| IL-18      | 3.3            | 3.5        | 0.693   | 3.4                   | 0.4        | 0.119        | 2.6                  | 3.05       | 0.578   | 3.7            | 4.2         | 0.901        |
| IP-10      | 6.6            | 7.95       | 0.271   | 9.4                   | 9.8        | 0.897        | 11.3                 | 11.35      | 0.742   | 13.05          | 12.5        | 0.730        |
| LIF        | 4.7            | 6.35       | 0.324   | 4.4                   | 5.65       | 0.775        | 4.9                  | 3.35       | 0.588   | 2.65           | 6.4         | 0.154        |
| M-CSF      | 2.3            | 2.1        | 0.919   | 0                     | 0          | 0.333        | 2.4                  | 2.55       | 0.688   | 2.5            | 2.9         | 0.931        |
| MCP-1      | 9.3            | 9.6        | 0.677   | 8.9                   | 8.95       | 0.897        | 9.6                  | 9.4        | 0.936   | 9.6            | 9.6         | 0.939        |
| MCP-3      | 7              | 7.9        | 0.207   | 7.3                   | 6.95       | 0.735        | 7.9                  | 6.8        | 0.136   | 8.05           | 8           | 0.992        |
| MIF        | 0              | 4.15       | 0.476   | 7.3                   | 4.4        | 0.815        | 7.6                  | 7          | 0.351   | 0              | 8.6         | 0.695        |
| MIG        | 5.5            | 8.4        | 0.057   | 8.6                   | 8.4        | 0.360        | 11.3                 | 11.2       | 0.873   | 12.9           | 12.8        | 0.486        |
| MIP-1α     | 5              | 3.25       | 0.848   | 4.1                   | 6.5        | 0.389        | 0                    | 1.05       | 0.156   | 0              | 0           | 0.238        |
| MIP-1β     | 7.9            | 7.6        | 0.848   | 6.4                   | 7          | 0.515        | 6.8                  | 8          | 0.275   | 7.25           | 8.8         | 0.348        |
| PDGF-bb    | 8.4            | 8.35       | 0.919   | 5.9                   | 0          | 0.333        | 8.4                  | 7.35       | 0.515   | <b>6.85</b>    | <b>9</b>    | <b>0.038</b> |
| RANTES     | 9.2            | 8.7        | 0.919   | 0                     | 4.4        | 0.775        | 9.3                  | 9.85       | 0.781   | <b>3.65</b>    | <b>10.5</b> | <b>0.038</b> |
| SCF        | 3.6            | 4.25       | 0.313   | 3.3                   | 1.85       | 0.585        | 3.3                  | 2.65       | 0.619   | 3.65           | 4.6         | 0.752        |
| SCGF-β     | 14.1           | 14.05      | 0.744   | 13.5                  | 12.6       | 0.095        | 14                   | 14.1       | 0.810   | 14.5           | 14.5        | 0.662        |
| SDF-1α     | 4.9            | 7.05       | 0.092   | 6.6                   | 0          | 0.217        | 4.6                  | 1.95       | 0.278   | 4.4            | 6.3         | 0.344        |
| TNF-α      | 4.9            | 8.05       | 0.168   | 4.7                   | 5.05       | 1.000        | 5.3                  | 6          | 0.928   | 6.1            | 7.1         | 0.756        |
| TNF-β      | 5.8            | 6.9        | 0.313   | 5                     | 5.6        | 0.856        | 5.8                  | 5.75       | 0.929   | 5.9            | 6.9         | 0.201        |
| TRAIL      | 4.9            | 6.65       | 0.079   | 5.1                   | 2.2        | 0.360        | 4.7                  | 5.6        | 0.971   | 4.95           | 5.6         | 0.985        |
| VEGF       | 0              | 0          | 0.660   | 4.1                   | 0          | 0.418        | 6                    | 6.8        | 0.525   | 0              | 0           | 0.773        |

**Footnote**

Median values of all biomarkers classified based on TB-endemicity (defined as country with a TB incidence  $\geq 40$  cases of TB-infection with active disease/100,000 inhabitants). P-values were calculated using the Mann-Whitney U test. P-values  $< 0.05$  with their corresponding biomarker values are marked bold. Includes all data. Cytokine data are log2 transformed values.

Abbreviations used: TB: Tuberculosis

\*From one individual the country of origin could not be retrieved

**Supplementary Table S3. All biomarkers categorized by autoimmune disease**

| Biomarkers | Low-negative  |             |              | Borderline profile - |            |              | Borderline profile + |             |              | Positive      |            |              |
|------------|---------------|-------------|--------------|----------------------|------------|--------------|----------------------|-------------|--------------|---------------|------------|--------------|
|            | no AI<br>N=29 | AI<br>N=28  | p-value      | no AI<br>N=21        | AI<br>N=7  | p-value      | no AI<br>N=41        | AI<br>N=18  | p-value      | no AI<br>N=36 | AI<br>N=15 | p-value      |
| β-NGF      | 0             | 0           | 0.592        | 0                    | 0          | 0.917        | 1.3                  | 0.55        | 0.511        | 0.3           | 0          | 0.072        |
| CTACK      | 4.3           | 5.25        | 0.889        | 0                    | 6.2        | 0.172        | 4.5                  | 5.1         | 0.314        | 1.6           | 4.7        | 0.974        |
| eotaxin    | 0             | 0           | 0.373        | 0                    | 0.9        | 0.080        | 0                    | 0           | 0.464        | 0             | 0          | 0.371        |
| FGF-basic  | 2.3           | 3.55        | 0.194        | <b>2.7</b>           | <b>4.4</b> | <b>0.048</b> | 1.9                  | 2.95        | 0.306        | 4.5           | 2.5        | 0.074        |
| G-CSF      | 0             | 7.65        | 0.601        | <b>5.5</b>           | <b>9.7</b> | <b>0.017</b> | 0                    | 0           | 0.956        | 0             | 0          | 0.603        |
| GM-CSF     | 0             | 0           | 0.779        | 0                    | 0          | 0.466        | 0.3                  | 0           | 0.499        | <b>2.3</b>    | <b>0</b>   | <b>0.008</b> |
| GRO-α      | 8.8           | 9.4         | 0.712        | 6.5                  | 9.9        | 0.678        | 8.4                  | 6.3         | 0.080        | 9.45          | 8.8        | 0.122        |
| HGF        | 4.3           | 6.3         | 0.479        | 4                    | 6.9        | 0.126        | <b>3.1</b>           | <b>7.25</b> | <b>0.007</b> | 7.5           | 6.9        | 0.917        |
| IFN-α2     | 0             | 0.55        | 0.545        | 0                    | 3.2        | 0.113        | 0                    | 1.85        | 0.143        | 3.25          | 1.5        | 0.169        |
| IFN-γ      | 3.2           | 3.4         | 0.968        | 2.6                  | 4          | 0.296        | 3.7                  | 3.35        | 0.348        | 4.95          | 4.4        | 0.475        |
| IL-1α      | 0             | 4.85        | 0.421        | 4.4                  | 5.5        | 0.113        | 2.3                  | 2.3         | 0.759        | 5.7           | 0          | 0.186        |
| IL-1β      | 4.2           | 5.25        | 0.928        | 4.1                  | 6.8        | 0.071        | 0                    | 4.15        | 0.70         | 5.8           | 0          | 0.130        |
| IL-1ra     | 10.2          | 10.6        | 0.182        | 9.2                  | 10.2       | 0.126        | 10.6                 | 11          | 0.444        | 12.2          | 11.4       | 0.456        |
| IL-2       | 3.1           | 2.3         | 0.492        | 1.3                  | 2.7        | 0.296        | 4                    | 3.35        | 0.499        | 5.75          | 5.5        | 0.264        |
| IL-2ra     | 4.9           | 5.8         | 0.204        | 0                    | 5.2        | 0.405        | 4.9                  | 5.35        | 0.836        | 5             | 5.1        | 0.841        |
| IL-3       | 0             | 0           | 0.523        | 0                    | 0          | 0.604        | 0                    | 0           | 0.437        | <b>0</b>      | <b>0</b>   | <b>0.043</b> |
| IL-4       | 0             | 0           | 0.649        | 0                    | 1          | 0.499        | 0                    | 0.15        | 0.426        | 1             | 0          | 0.374        |
| IL-5       | 0             | 0           | 0.423        | 0                    | 0          | 0.717        | 4.5                  | 2.35        | 0.663        | <b>4.5</b>    | <b>0</b>   | <b>0.004</b> |
| IL-6       | 7.8           | 7.7         | 0.562        | 6                    | 8.4        | 0.172        | 6.6                  | 0           | 0.331        | 6.65          | 0          | 0.159        |
| IL-7       | 0             | 0           | 0.591        | 0                    | 2.2        | 0.376        | 0                    | 0           | 0.621        | 0             | 0          | 0.752        |
| IL-8       | 12.1          | 11.8        | 0.520        | 11.3                 | 12.9       | 0.435        | 12.3                 | 11.05       | 0.109        | 12.65         | 11.2       | 0.156        |
| IL-9       | 5             | 6.2         | 0.122        | 5.3                  | 5.7        | 0.640        | 5.7                  | 5.15        | 0.703        | <b>6.85</b>   | <b>3.8</b> | <b>0.002</b> |
| IL-10      | 0             | 0           | 0.764        | 0                    | 0          | 0.678        | 0                    | 0           | 0.624        | 0             | 0          | 0.754        |
| IL-12p70   | 0             | 0           | 0.309        | 0                    | 0          | 0.272        | 0                    | 0           | 0.166        | 0             | 0          | 0.539        |
| IL-12p40   | 3.5           | 5.15        | 0.743        | 6.2                  | 6.3        | 0.959        | 0                    | 4.1         | 0.516        | 5.2           | 5          | 0.441        |
| IL-13      | 0             | 0           | 0.543        | 0                    | 0          | 0.499        | 0                    | 0           | 0.762        | <b>0.8</b>    | <b>0</b>   | <b>0.022</b> |
| IL-15      | 0             | 0           | 0.92         | 0                    | 0          | 0.249        | 0                    | 0           | 0.686        | 0             | 0          | 0.523        |
| IL-16      | 0             | 3.25        | 0.365        | 0                    | 3.5        | 0.126        | 0                    | 0.95        | 0.497        | 5.05          | 0          | 0.265        |
| IL-17A     | 0             | 1.5         | 0.293        | <b>0</b>             | <b>2.7</b> | <b>0.027</b> | 0                    | 1.2         | 0.331        | 2.1           | 2.7        | 0.785        |
| IL-18      | <b>3.1</b>    | <b>4.15</b> | <b>0.037</b> | 2.1                  | 3          | 0.917        | 2.6                  | 3.35        | 0.595        | 3.8           | 4.1        | 0.521        |
| IP-10      | 6.6           | 7.05        | 0.754        | 9.1                  | 10.2       | 0.055        | 11.3                 | 11.4        | 0.974        | 12.95         | 12.1       | 0.059        |
| LIF        | 5.4           | 5.4         | 0.895        | 3.4                  | 5.8        | 0.208        | 3.9                  | 5.65        | 0.261        | 6.25          | 0          | 0.093        |
| M-CSF      | 1.7           | 2.6         | 0.139        | 0                    | 1.6        | 0.272        | 2.4                  | 2.4         | 0.747        | 2.95          | 2          | 0.292        |
| MCP-1      | 9.3           | 9.25        | 0.420        | 8.8                  | 8.9        | 0.876        | 9.6                  | 9.3         | 0.263        | 9.55          | 9.7        | 0.764        |
| MCP-3      | 7.5           | 7           | 0.968        | 7.2                  | 7.3        | 0.678        | 7.8                  | 7.85        | 0.908        | 8.1           | 7.7        | 0.780        |
| MIF        | 0             | 5.9         | 0.444        | <b>0</b>             | <b>9.7</b> | <b>0.048</b> | 6.8                  | 8.05        | 0.565        | 9             | 0          | 0.113        |
| MIG        | 6.2           | 5.7         | 0.551        | 8.5                  | 8.6        | 0.678        | 11.2                 | 11.4        | 0.837        | 13.2          | 12.6       | 0.115        |
| MIP-1α     | 5             | 5.1         | 0.861        | 4.1                  | 5.2        | 0.836        | 0                    | 0           | 0.924        | 0             | 0          | 0.372        |
| MIP-1β     | 6.8           | 8.05        | 0.384        | 6.4                  | 7.7        | 0.466        | 7.5                  | 7.05        | 0.340        | 8.5           | 8.4        | 0.454        |
| PDGF-bb    | 7.7           | 8.65        | 0.135        | 3.3                  | 5.1        | 0.568        | 7.9                  | 8.5         | 0.907        | 8.8           | 6.1        | 0.308        |
| RANTES     | 7.8           | 10          | 0.254        | 0                    | 8.8        | 0.435        | 9.7                  | 9.25        | 0.390        | 10.35         | 9          | 0.348        |
| SCF        | 3.2           | 3.75        | 0.949        | 0                    | 3.7        | 0.296        | 2.5                  | 3.9         | 0.230        | 4.7           | 3          | 0.159        |
| SCGF-β     | 13.9          | 14.15       | 0.690        | 13                   | 14.3       | 0.208        | 14.3                 | 13.8        | 0.098        | 14.4          | 14.7       | 0.756        |
| SDF-1α     | 3.8           | 6.55        | 0.251        | 4.3                  | 7.1        | 0.155        | 3.9                  | 5.65        | 0.404        | <b>6.3</b>    | <b>0</b>   | <b>0.046</b> |
| TNF-α      | 4.9           | 5.1         | 0.591        | 2.9                  | 6.5        | 0.140        | 3.9                  | 6.25        | 0.327        | 6.95          | 0          | 0.205        |
| TNF-β      | 5.5           | 6.05        | 0.334        | 5                    | 6.7        | 0.296        | 5.8                  | 5.65        | 0.862        | <b>6.9</b>    | <b>5</b>   | <b>0.029</b> |
| TRAIL      | 5.3           | 4.9         | 0.786        | 4.9                  | 5.8        | 0.321        | 4.1                  | 5.8         | 0.091        | 5.7           | 4.7        | 0.171        |
| VEGF       | 0             | 0           | 0.314        | 0                    | 7.1        | 0.376        | 6.7                  | 2.65        | 0.088        | 3.2           | 0          | 0.440        |

**Footnote**

Median values of all biomarkers classified based on the presence of any autoimmune disease. P-values were calculated using the Mann-Whitney U test. P-values <0.05 with their corresponding biomarker values are marked bold. Includes all data. Cytokine data are log2 transformed values.

Abbreviations used: AI: autoimmune disease

**Supplementary Table S4. All biomarkers categorized by immunosuppressive therapy**

| Biomarkers | Low-negative    |              |              | Borderline profile - |             |              | Borderline profile + |             |              | Positive        |             |         |
|------------|-----------------|--------------|--------------|----------------------|-------------|--------------|----------------------|-------------|--------------|-----------------|-------------|---------|
|            | No I.S.<br>N=40 | I.S.<br>N=11 | p-value      | No I.S.<br>N=15      | I.S.<br>N=8 | p-value      | No I.S.<br>N=35      | I.S.<br>N=9 | p-value      | No I.S.<br>N=36 | I.S.<br>N=5 | p-value |
| β-NGF      | 0               | 0            | 0.673        | 0                    | 0           | 0.591        | 1.7                  | 1.1         | 0.422        | 0               | 0           | 0.954   |
| CTACK      | 5.1             | 4.6          | 0.742        | 3.4                  | 2.4         | 1.000        | 4.5                  | 4.7         | 0.932        | 4.55            | 0           | 0.217   |
| eotaxin    | 0               | 0            | 0.406        | 0                    | 0           | 0.636        | 0                    | 0           | 0.184        | 0               | 0           | 0.954   |
| FGF-basic  | 1.65            | 3.4          | 0.098        | 3.1                  | 3.95        | 0.875        | 2.1                  | 3.7         | 0.606        | 3.9             | 5.1         | 0.232   |
| G-CSF      | 1.75            | 8.9          | 0.127        | <b>5.5</b>           | <b>9.85</b> | <b>0.023</b> | 0                    | 0           | 0.567        | 0               | 8.4         | 0.202   |
| GM-CSF     | 0               | 0            | 0.946        | 0                    | 0           | 1.000        | 0                    | 0           | 0.627        | 0.55            | 0           | 0.629   |
| GRO-α      | 9.2             | 9.7          | 0.328        | 9.4                  | 3.2         | 0.357        | 9.2                  | 0           | 0.027        | 9.25            | 10          | 0.449   |
| HGF        | 5.15            | 7.1          | 0.394        | 4                    | 6.3         | 0.265        | 6                    | 6.8         | 0.627        | 7.15            | 7.8         | 0.574   |
| IFN-α2     | 0               | 0            | 0.831        | 2                    | 2.95        | 0.466        | 0                    | 2.4         | 0.300        | 2.05            | 3.4         | 0.449   |
| IFN-γ      | 3.15            | 3.4          | 0.270        | 4                    | 3.1         | 0.975        | 3.7                  | 3.1         | 0.098        | 4.8             | 5.3         | 0.340   |
| IL-1α      | 1.2             | 4.6          | 0.762        | 4.4                  | 5.65        | 0.076        | 4.6                  | 4           | 0.689        | 5.05            | 6.1         | 0.403   |
| IL-1β      | 4.2             | 4.8          | 0.671        | 5.3                  | 5.6         | 0.681        | 3.5                  | 5.3         | 0.710        | 5.2             | 7.9         | 0.283   |
| IL-1ra     | 10.3            | 10.9         | 0.191        | 9                    | 9           | 0.506        | 11                   | 11.1        | 0.977        | 11.85           | 11.4        | 0.713   |
| IL-2       | 2.6             | 2.3          | 0.772        | 1.3                  | 2.1         | 0.636        | 3.5                  | 4           | 1.000        | 5.5             | 5.9         | 0.548   |
| IL-2ra     | 5.5             | 5.7          | 0.729        | 0                    | 5.35        | 0.466        | 5.3                  | 3.1         | 0.287        | 4.75            | 6.3         | 0.574   |
| IL-3       | 0               | 0            | 0.354        | 0                    | 0           | 1.000        | 0                    | 0           | 0.373        | 0               | 0           | 0.713   |
| IL-4       | 0               | 0            | 0.687        | 0                    | 0.35        | 0.975        | 0                    | 0           | 0.474        | 0.05            | 1.4         | 0.340   |
| IL-5       | 0               | 0            | 0.856        | 0                    | 0           | 0.975        | 4.9                  | 0           | 0.184        | 0               | 0           | 0.862   |
| IL-6       | 7.8             | 7.7          | 0.917        | 6.4                  | 5.45        | 0.548        | 7.2                  | 0           | 0.076        | 3.95            | 8.4         | 0.522   |
| IL-7       | 0               | 0            | 0.280        | 0                    | 2.75        | 0.087        | 0                    | 0           | 0.886        | 0               | 0           | 0.685   |
| IL-8       | 12.1            | 11.5         | 0.890        | 12.6                 | 11.4        | 0.925        | 11.8                 | 11.8        | 0.864        | 11.75           | 11.8        | 0.954   |
| IL-9       | 5.45            | 6.4          | 0.213        | 5.3                  | 5.25        | 0.591        | 5.8                  | 5.7         | 0.548        | 6               | 6.4         | 0.893   |
| IL-10      | 0               | 1.3          | 0.160        | 0.7                  | 0.25        | 0.825        | <b>0.8</b>           | <b>0</b>    | <b>0.047</b> | 0               | 2.5         | 0.301   |
| IL-12p70   | 0               | 0            | 0.600        | 0                    | 0           | 0.825        | 0                    | 0           | 0.731        | 0               | 0           | 0.862   |
| IL-12p40   | 2.3             | 6.3          | 0.374        | 6.4                  | 6.6         | 1.000        | 4.9                  | 0           | 0.689        | 2.45            | 6.5         | 0.320   |
| IL-13      | 0               | 0            | 0.426        | 0                    | 0           | 0.636        | 0                    | 0           | 0.841        | 0               | 0           | 1.000   |
| IL-15      | 0               | 0            | 0.814        | 0                    | 0           | 0.728        | 0                    | 0           | 0.529        | 0               | 0           | 0.574   |
| IL-16      | 0               | 0            | 0.219        | 0                    | 4.55        | 0.294        | 0                    | 0           | 0.510        | 4.85            | 1.3         | 0.601   |
| IL-17A     | 0.95            | 2.9          | 0.189        | 1.6                  | 1.7         | 0.728        | 1.4                  | 0.2         | 0.647        | 2.05            | 3.7         | 0.175   |
| IL-18      | 3.35            | 3.2          | 0.881        | 3.5                  | 1.15        | 0.065        | 2.6                  | 3.5         | 0.422        | 4.25            | 2.5         | 0.283   |
| IP-10      | 6.55            | 7.3          | 0.227        | 9.4                  | 9.8         | 0.294        | 11.4                 | 11.3        | 0.954        | 12.6            | 12.5        | 0.629   |
| LIF        | 3.7             | 5.7          | 0.739        | 4.4                  | 5.65        | 0.681        | 4.9                  | 5.5         | 0.954        | 5.4             | 6.5         | 0.283   |
| M-CSF      | 2.2             | 2.6          | 0.272        | 0                    | 0           | 0.875        | 2.4                  | 2.4         | 0.287        | 2.1             | 3.2         | 0.923   |
| MCP-1      | 9.2             | 10.2         | 0.252        | 8.7                  | 8.05        | 0.875        | 9.6                  | 9.1         | 0.054        | 9.55            | 9.7         | 0.656   |
| MCP-3      | 6.95            | 7.8          | 0.292        | 6.9                  | 5.85        | 0.825        | 7.8                  | 8           | 0.797        | 8.05            | 7.7         | 0.985   |
| MIF        | 0               | 5.9          | 0.871        | 6.2                  | 9.25        | 0.265        | 6.8                  | 9           | 0.492        | 4.1             | 8.9         | 0.685   |
| MIG        | 5.65            | 6            | 0.844        | 8.9                  | 8.1         | 0.466        | 11.3                 | 10.8        | 0.098        | 12.9            | 12.8        | 0.360   |
| MIP-1α     | 1.7             | 6.7          | 0.177        | 4.1                  | 5.2         | 0.776        | 0                    | 0           | 0.647        | 0               | 8.2         | 0.426   |
| MIP-1β     | <b>6.8</b>      | <b>8.9</b>   | <b>0.042</b> | 7.7                  | 6.7         | 0.681        | 7.2                  | 7.1         | 0.586        | 8.3             | 9.5         | 0.656   |
| PDGF-bb    | 8.1             | 8.7          | 0.614        | 5.9                  | 4.2         | 0.975        | 7.5                  | 8.6         | 0.300        | 8.65            | 9.7         | 0.497   |
| RANTES     | 9.25            | 10.3         | 0.972        | 0                    | 4.4         | 0.975        | 10                   | 5           | 0.111        | 10.65           | 7.3         | 0.629   |
| SCF        | 3.35            | 3.8          | 0.853        | 3.3                  | 3.5         | 0.925        | 3.4                  | 3.3         | 0.932        | 4.7             | 4.3         | 0.923   |
| SCGF-β     | 13.9            | 14.4         | 0.097        | 13.3                 | 12.8        | 0.636        | <b>14.3</b>          | <b>12.9</b> | <b>0.015</b> | 14.6            | 12.5        | 0.497   |
| SDF-1α     | 6.2             | 6.5          | 0.917        | 0                    | 6.9         | 0.325        | 4.2                  | 2.8         | 0.797        | 5.45            | 2.9         | 0.656   |
| TNF-α      | 4.65            | 6.4          | 0.841        | 4.3                  | 6.15        | 0.428        | 5.6                  | 6.8         | 0.886        | 6.05            | 8.5         | 0.188   |
| TNF-β      | 5.65            | 6.3          | 0.204        | 4.6                  | 6.45        | 0.506        | 5.8                  | 5.8         | 0.405        | 6.75            | 6.1         | 0.985   |
| TRAIL      | 4.9             | 4.9          | 0.571        | 6                    | 4.85        | 0.636        | 5.2                  | 5.7         | 0.775        | 5.4             | 6.3         | 0.381   |
| VEGF       | 0               | 0            | 0.834        | 0                    | 3.45        | 0.975        | 7.4                  | 5.3         | 0.092        | 0               | 0           | 0.772   |

**Footnote**

Median values of all biomarkers classified based on concomitant use of immunosuppressive therapy.

P-values were calculated using the Mann-Whitney U test. P-values <0.05 with their corresponding biomarker values are marked bold. Includes all data. Cytokine data are log<sub>2</sub> transformed values.

Abbreviations used: I.S.: immunosuppressive therapy

## **Supplementary Figures**

### **Figure S1. Heatmap of all measured biomarkers**

Heatmap including all maximal Log2-transformed values of each biomarker (by column), with omittance of IFN- $\gamma$ , for each included individual (by row). Includes all data.

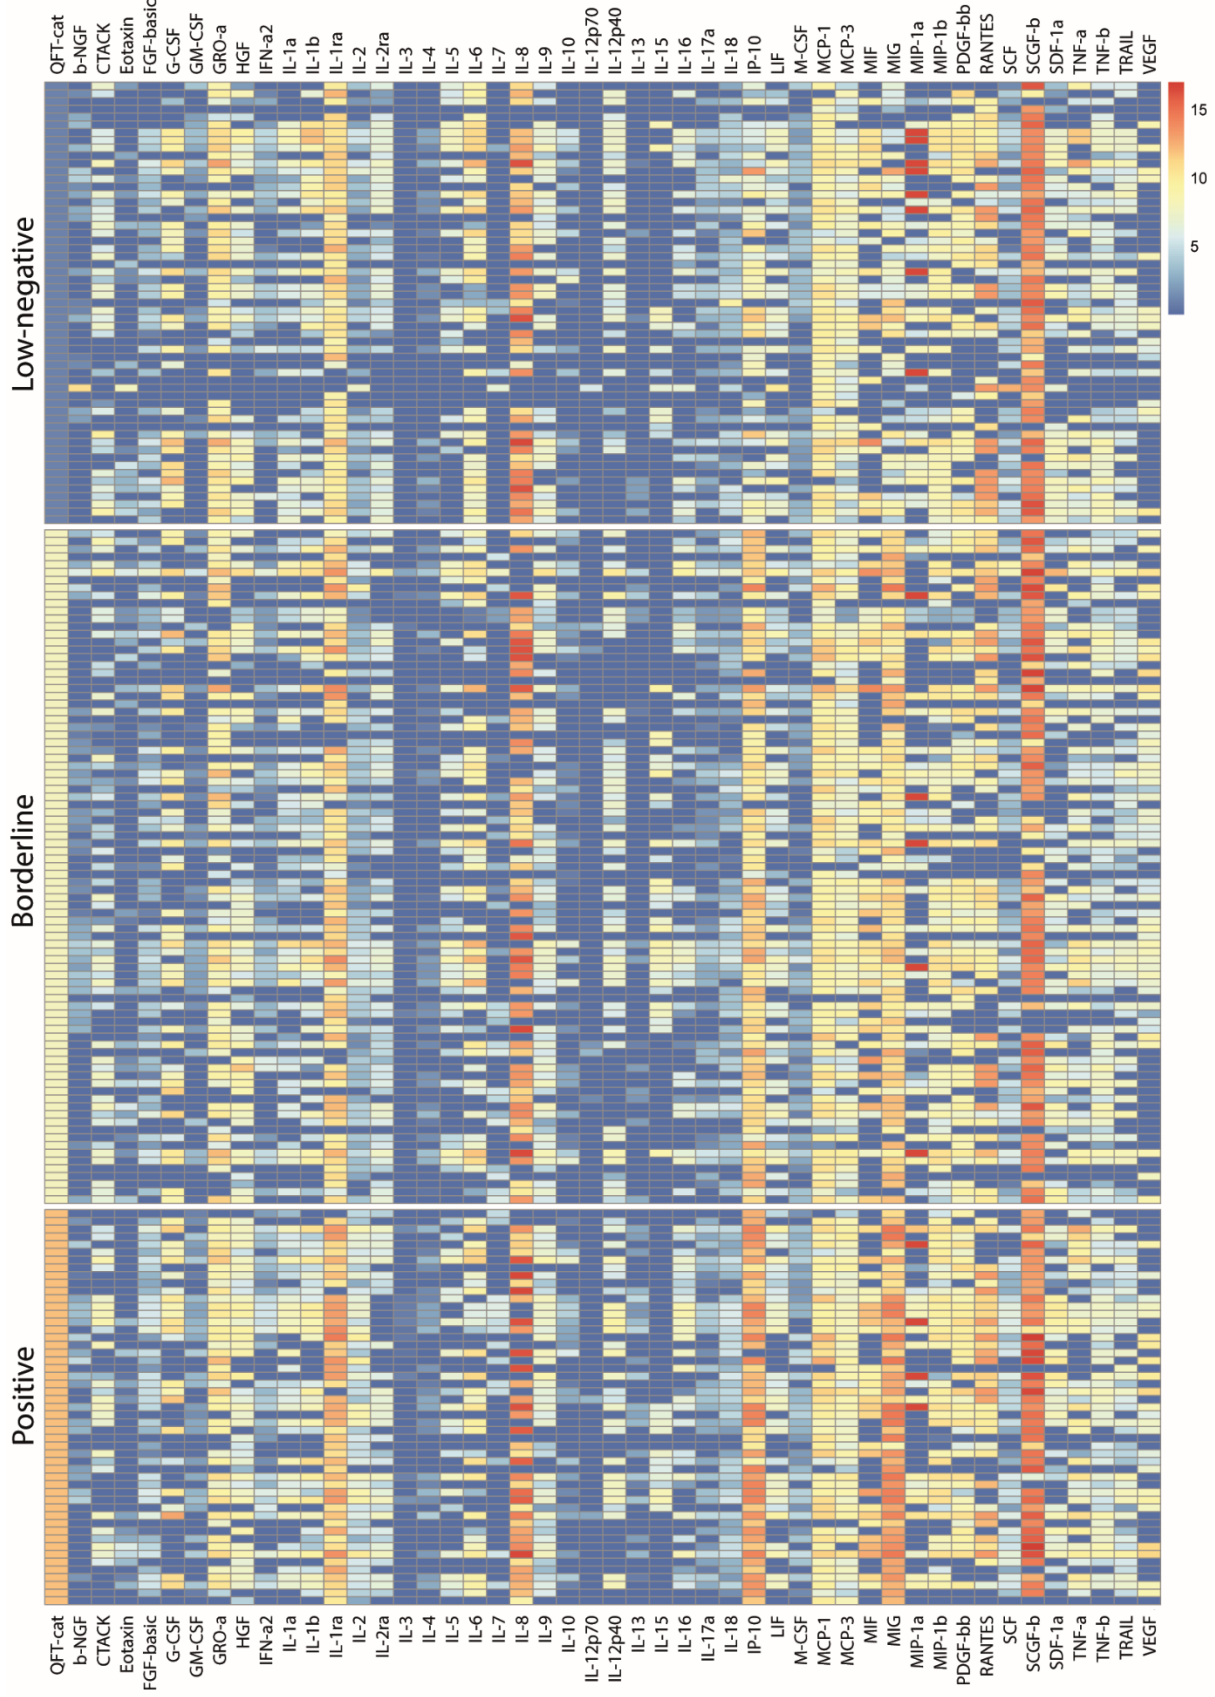

**Figure S2. Correlation between all biomarker values in the TB1 and TB2 tubes**

Correlation matrix including all biomarkers measured in the TB1 tubes (X-axis) and TB2 tubes (Y-axis) from those with a low-negative (A), borderline profile – (B), borderline profile + (C), and positive QuantiFERON result (D). Numbers in the graph denote the Spearman's rank correlation coefficients. Correlations were calculated using Spearman's test for correlation. Includes all data.

**Figure S2A**

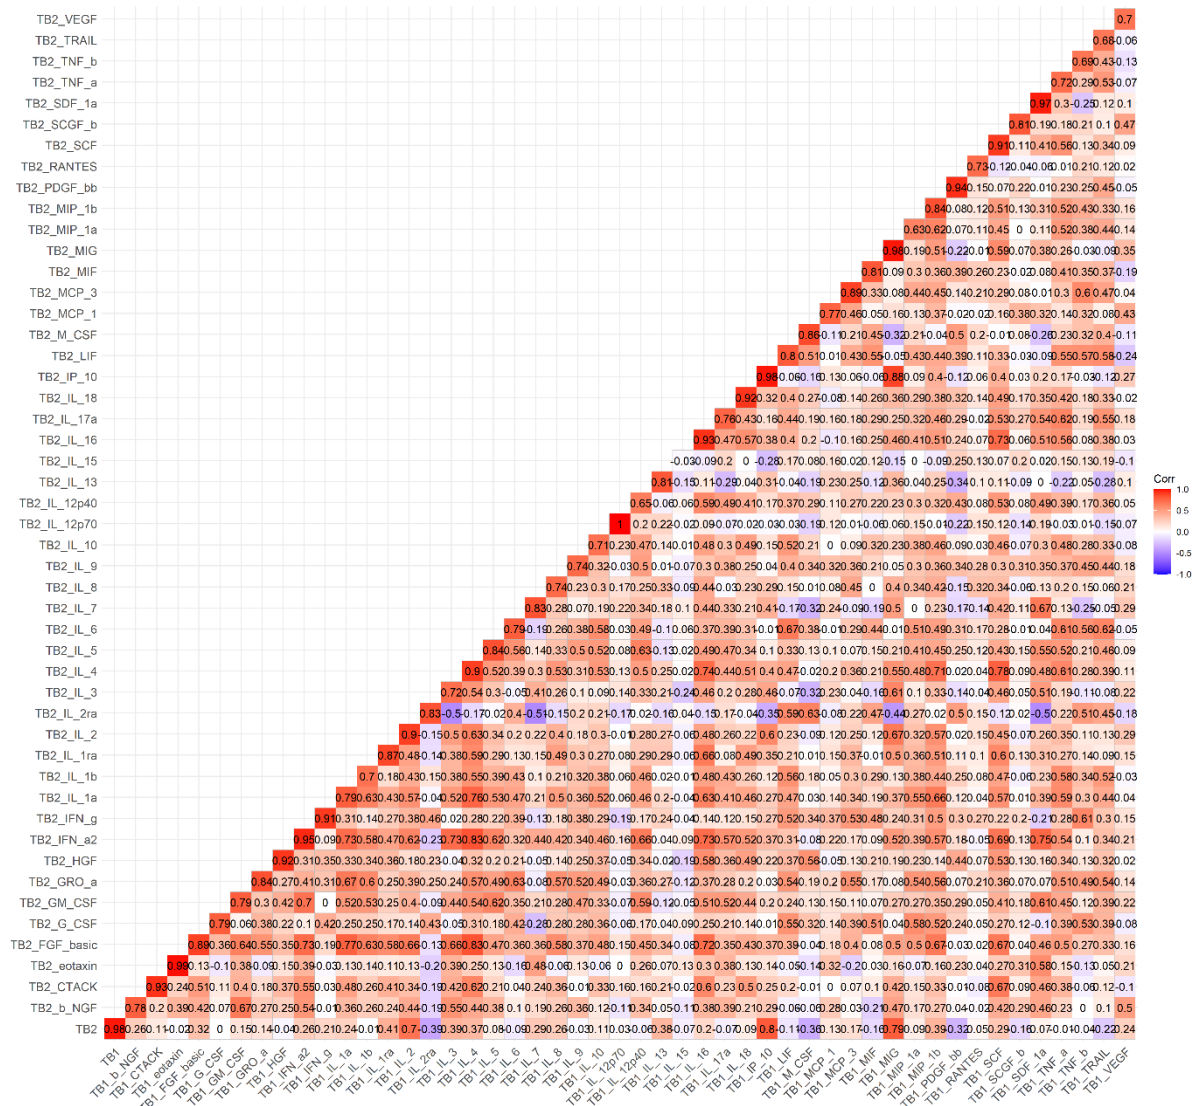

Figure S2B

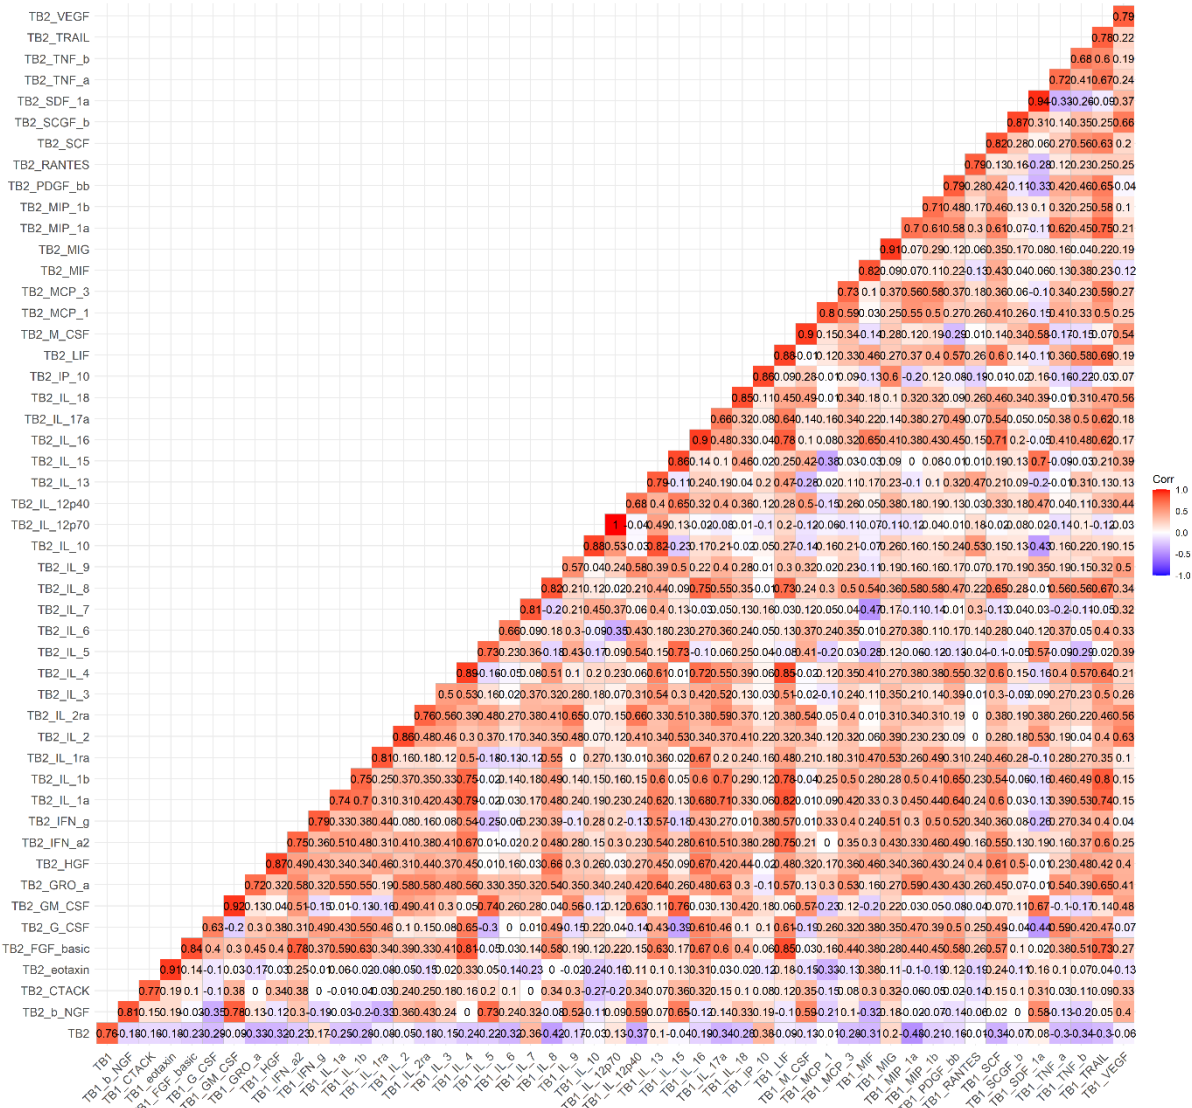



Figure S2C

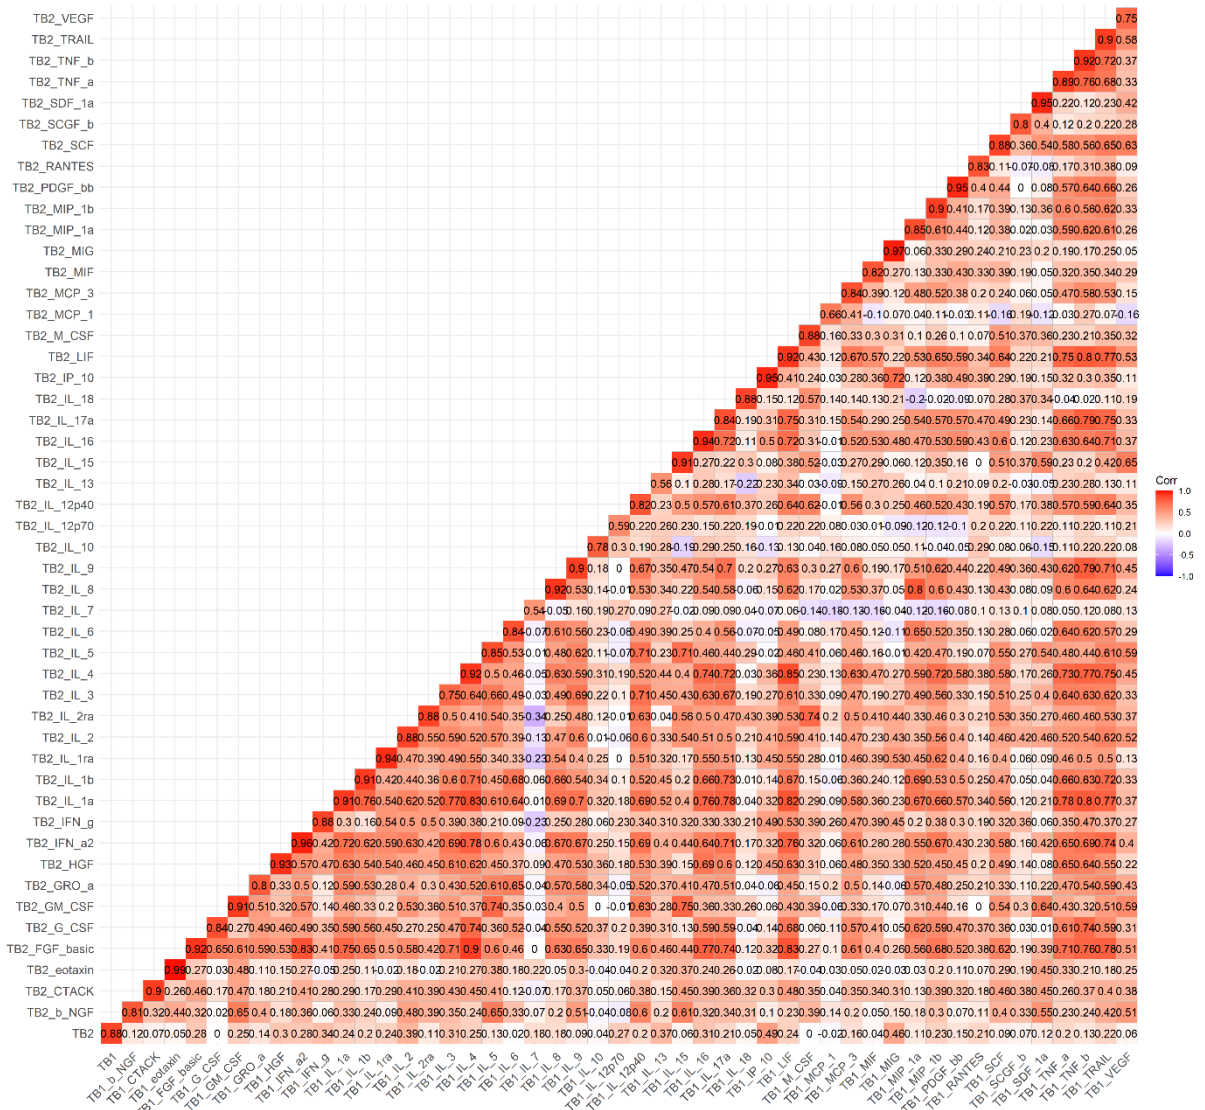

# Figure S2D

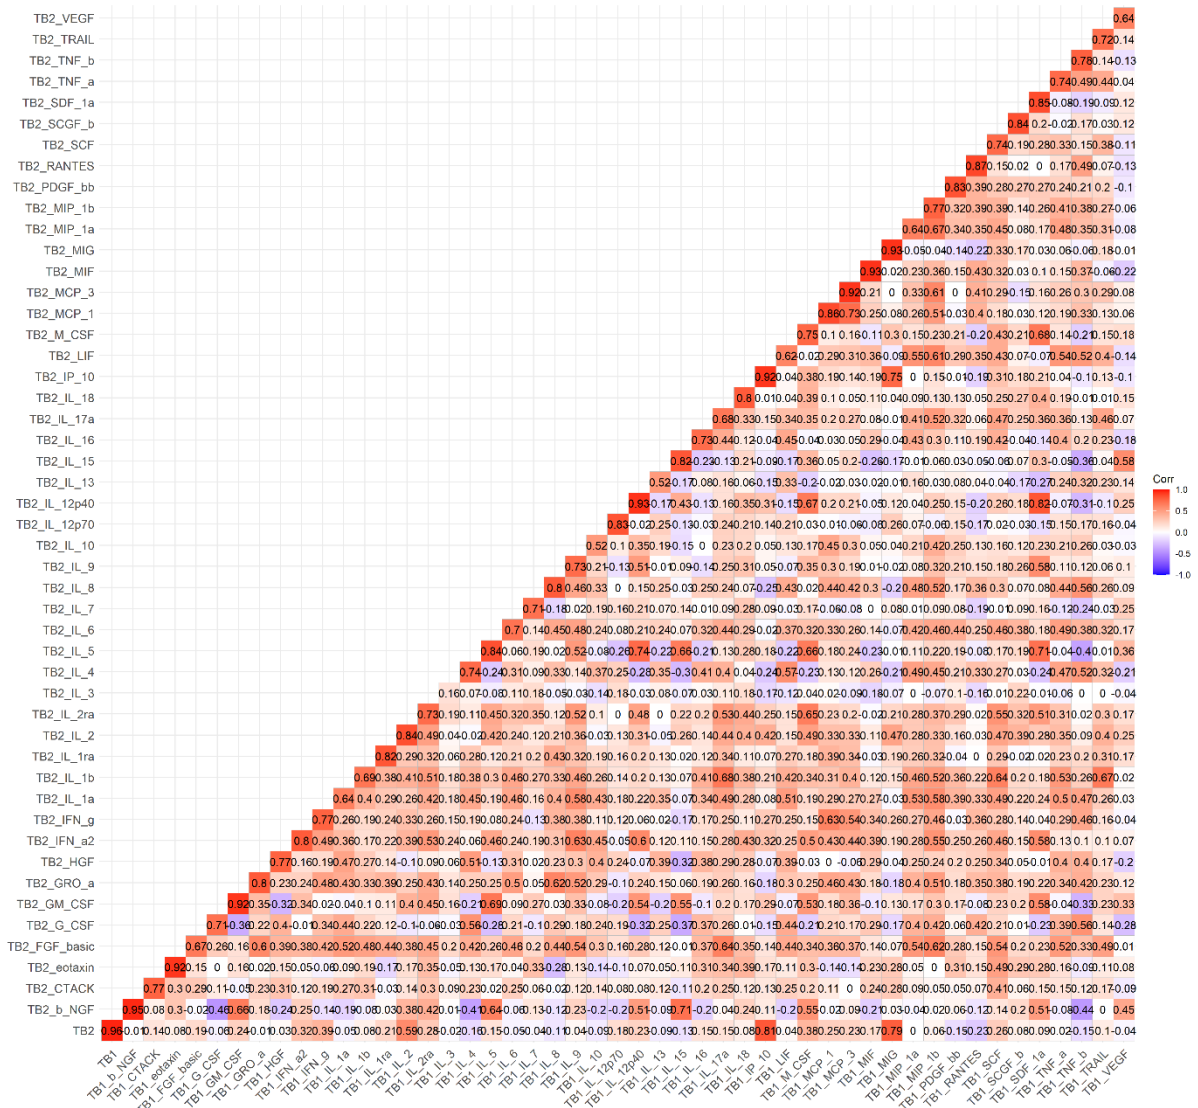

**Figure S3. Accuracy of IP-10, MIG and IL-1ra for TB-infection**

Receiver operating characteristic (ROC) curve plot showing the prediction accuracy of MIG (A), IP-10 (B) and IL-1ra (C) between patients with TB-infection (based on a positive QuantiFERON (QFT) result) and without TB-infection (based on a low-negative QFT result). Includes all data.

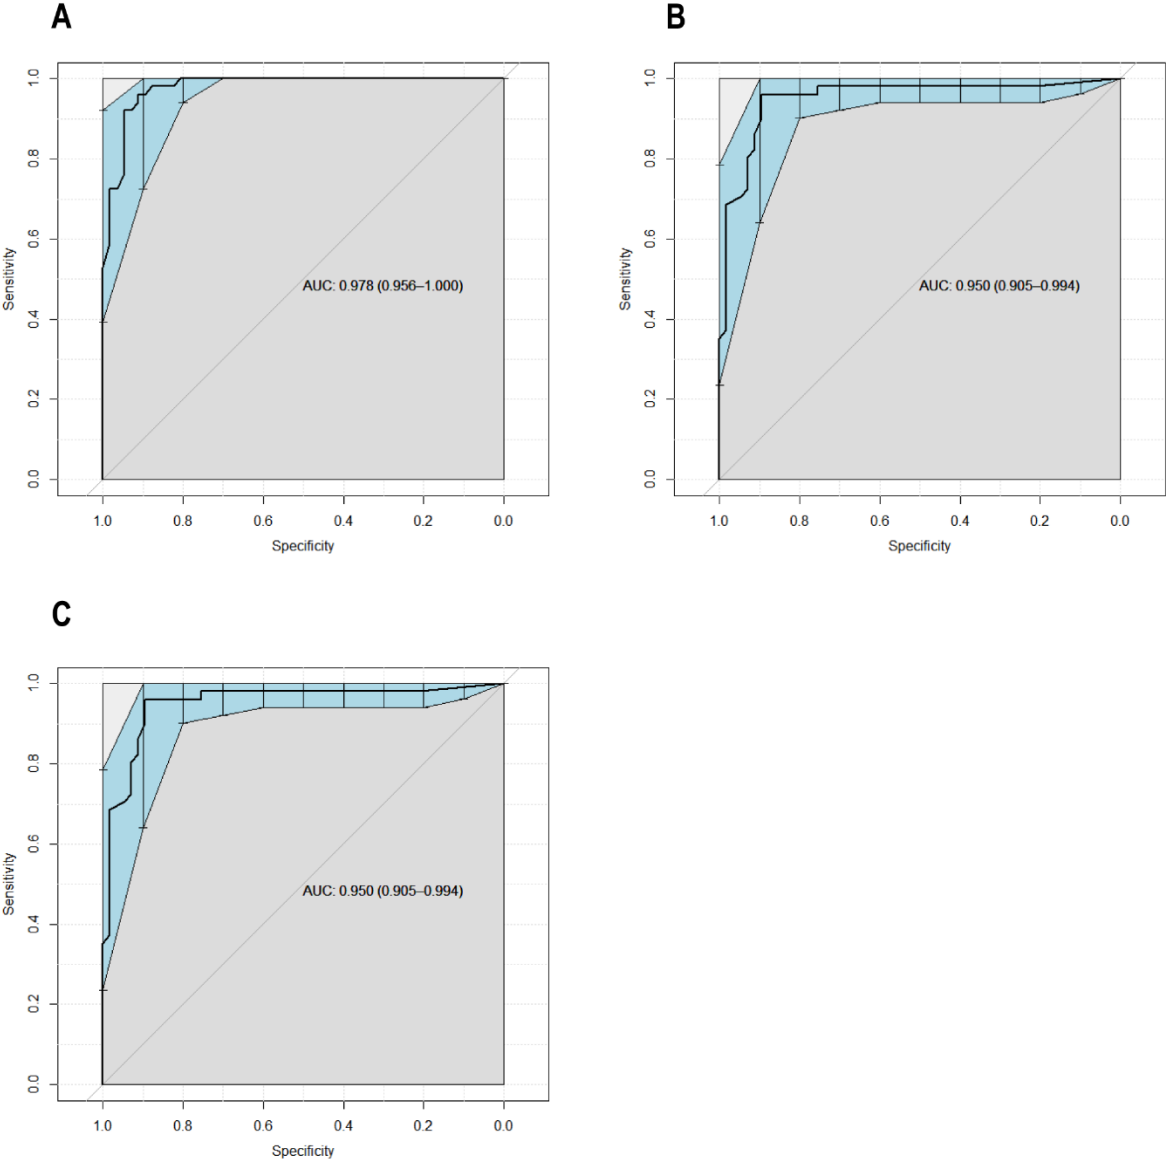

### Figure S4. Biomarker values by QuantiFERON-Plus categories

Median biomarker values displayed as box and whiskers (5%-95%). The lines represent the optimal cut-off (Youden Index) derived from receiver operating characteristic (ROC) curves (supplementary Figure 3). All data were log<sub>2</sub>-transformed prior to analysis. Includes all data.

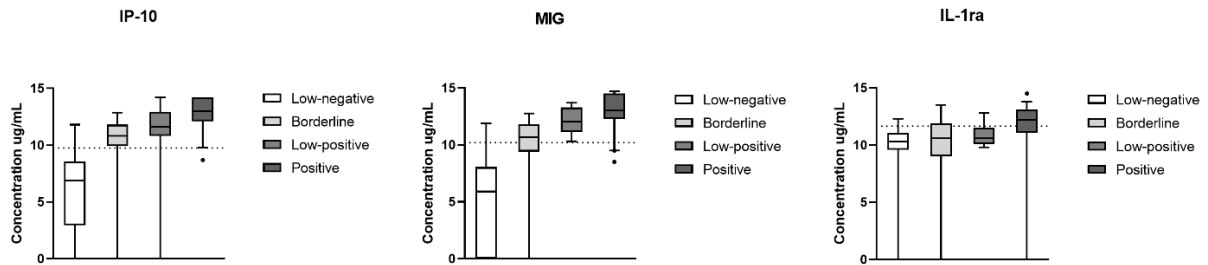

Supplement: inline-supplementary-material-1 [file inline-supplementary-material-1.pdf]
