# Supplementary material
Source: HighWire-hosted journal article supplement (https://erj.ersjournals.com/content/60/2/2102665)

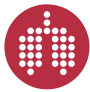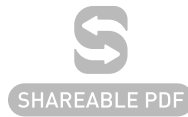

# Biomarkers to identify *Mycobacterium tuberculosis* infection among borderline QuantiFERON results

Jonathan W. Uzorka<sup>1</sup>, Jaap A. Bakker <sup>2</sup>, Krista E. van Meijgaarden<sup>1</sup>, Eliane M.S. Leyten<sup>3</sup>, Nathalie M. Delfos<sup>4</sup>, David J. Hetem<sup>5</sup>, Jos Kerremans<sup>6</sup>, Mieke Zwarts<sup>7</sup>, Sandra Cozijn<sup>8</sup>, Tom H.M. Ottenhoff<sup>1</sup>, Simone A. Joosten<sup>1</sup> and Sandra M. Arend<sup>1</sup>

<sup>1</sup>Dept of Infectious Diseases, Leiden University Medical Centre, Leiden, The Netherlands. <sup>2</sup>Dept of Clinical Chemistry and Laboratory Medicine, Leiden University Medical Centre, Leiden, The Netherlands. <sup>3</sup>Dept of Internal Medicine, Haaglanden Medical Centre, Den Haag, The Netherlands. <sup>4</sup>Dept of Internal Medicine, Alrijne Hospital, Leiderdorp, The Netherlands. <sup>5</sup>Dept of Medical Microbiology, Haaglanden Medical Centre, Den Haag, The Netherlands. <sup>6</sup>Dept of Medical Microbiology, Alrijne Hospital, Leiderdorp, The Netherlands. <sup>7</sup>Dept of Clinical Chemistry and Laboratory Medicine, Haaglanden Medical Centre, Den Haag, The Netherlands. <sup>8</sup>Dept of Medical Microbiology, Alrijne Hospital, Leiden, The Netherlands.

Corresponding author: Jonathan W. Uzorka ([j.w.uzorka@lumc.nl](mailto:j.w.uzorka@lumc.nl))

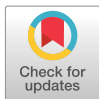

Shareable abstract (@ERSpublications)

**Additional laboratory testing of IP-10/CXCL10 and MIG/CXCL9 in individuals at increased risk of reactivation TB with a borderline QuantiFERON-TB Gold Plus result just below the formal cut-off helps to identify those with *M. tuberculosis* infection** <https://bit.ly/3t8zR7r>

**Cite this article as:** Uzorka JW, Bakker JA, van Meijgaarden KE, et al. Biomarkers to identify *Mycobacterium tuberculosis* infection among borderline QuantiFERON results. *Eur Respir J* 2022; 60: 2102665 [DOI: 10.1183/13993003.02665-2021].

This single-page version can be shared freely online.

Copyright ©The authors 2022.

This version is distributed under the terms of the Creative Commons Attribution Non-Commercial Licence 4.0. For commercial reproduction rights and permissions contact [permissions@ersnet.org](mailto:permissions@ersnet.org)

This article has an editorial commentary:  
<https://doi.org/10.1183/13993003.00697-2022>

Received: 8 Oct 2021  
Accepted: 18 Dec 2021

## Abstract

**Background** Screening for tuberculosis (TB) infection often includes QuantiFERON-TB Gold Plus (QFT) testing. Previous studies showed that two-thirds of patients with negative QFT results just below the cut-off, so-called borderline test results, nevertheless had other evidence of TB infection. This study aimed to identify a biomarker profile by which borderline QFT results due to TB infection can be distinguished from random test variation.

**Methods** QFT supernatants of patients with a borderline ( $\geq 0.15$  and  $< 0.35$  IU·mL<sup>-1</sup>), low-negative ( $< 0.15$  IU·mL<sup>-1</sup>) or positive ( $\geq 0.35$  IU·mL<sup>-1</sup>) QFT result were collected in three hospitals. Bead-based multiplex assays were used to analyse 48 different cytokines, chemokines and growth factors. A prediction model was derived using LASSO regression and applied further to discriminate QFT-positive *Mycobacterium tuberculosis*-infected patients from borderline QFT patients and QFT-negative patients

**Results** QFT samples of 195 patients were collected and analysed. Global testing revealed that the levels of 10 kDa interferon (IFN)- $\gamma$ -induced protein (IP-10/CXCL10), monokine induced by IFN- $\gamma$  (MIG/CXCL9) and interleukin-1 receptor antagonist in the antigen-stimulated tubes were each significantly higher in patients with a positive QFT result compared with low-negative QFT individuals ( $p < 0.001$ ). A prediction model based on IP-10 and MIG proved highly accurate in discriminating patients with a positive QFT (TB infection) from uninfected individuals with a low-negative QFT (sensitivity 1.00 (95% CI 0.79–1.00) and specificity 0.95 (95% CI 0.74–1.00)). This same model predicted TB infection in 68% of 87 patients with a borderline QFT result.

**Conclusions** This study was able to classify borderline QFT results as likely infection-related or random. These findings support additional laboratory testing for either IP-10 or MIG following a borderline QFT result for individuals at increased risk of reactivation TB.

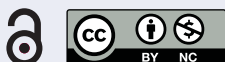

Supplement: inline-supplementary-material-2 [file inline-supplementary-material-2.pdf]
